# Supplementary material for: Exogenously Applied GA3 Enhances Morphological Parameters of Tolerant and Sensitive Cyclamen persicum Genotypes under Ambient Temperature and Heat Stress Conditions
Source: MDPI journal article supplement (doi:10.3390/plants11141868), 2022-07-18
Supplement: s1 [file s1]

Table S1. Overview of 16 Cyclamen genotypes used in this study

| Species                                     | Sample ID | Variety               | Agronomic group | Geographical origin | Resistance                 |
|---------------------------------------------|-----------|-----------------------|-----------------|---------------------|----------------------------|
| <i>Cyclamen persicum</i> Mill.<br>genotypes | C1        | Petticoat pure white  | 1               | The Netherlands     | Cold                       |
|                                             | C2        | Petticoat light eye   | 1               | The Netherlands     | Cold                       |
|                                             | C3        | Smartiz Victoria      | 2               | France              | Moderate heat              |
|                                             | C4        | Smartiz Violet Fonce  | 1               | The Netherlands     | Low heat                   |
|                                             | C5        | Metis Victoria        | 1               | The Netherlands     | Cold                       |
|                                             | C6        | Metis Blank pur       | 1               | The Netherlands     | Cold                       |
|                                             | C7        | Halios Falbala        | 1               | The Netherlands     | Moderate heat              |
|                                             | C8        | Latinia Pipoca        | 1               | The Netherlands     | Botrytis and moderate heat |
|                                             | C9        | Jive Salmon Red       | 2               | France              | Moderate heat              |
|                                             | C10       | Merengue Salmon red   | 2               | France              | Heat                       |
|                                             | C11       | Verano st.            | 1               | The Netherlands     | Cold                       |
|                                             | C12       | Petticoat dark violet | 2               | France              | Cold                       |
|                                             | C13       | Metis Origami         | 1               | The Netherlands     | Cold                       |
|                                             | C14       | Merengue Pure white   | 2               | France              | Heat                       |
|                                             | C15       | Merengue Magenta      | 2               | France              | Heat                       |
|                                             | C16       | Metis Silver leaf     | 1               | The Netherlands     | Heat                       |
